# Supplementary material
Source: publisher figshare collection journal article supplement (https://tandf.figshare.com/ndownloader/files/13297625)
Supplement: Supplementary file 1 [file 13297625]

**Supplemental Table to the manuscript:**

**A novel germline mutation in *GP1BA* gene N-terminal domain in monoallelic Bernard-Soulier syndrome**

Jakub Trizuljak1,2 ‡, Kateřina Staňo Kozubík1,2 ‡, Lenka Radová2, Michaela Pešová2, Karol Pál2, Kamila Réblová2, Olga Stehlíková1, Petr Smejkal3,4, Jiřina Zavřelová3,4, Milan Pacejka5, Jiří Mayer1,2, Šárka Pospíšilová1,2, Michael Doubek1,2

1 Department of Internal Medicine- Hematology and Oncology, University Hospital Brno and Faculty of Medicine, Masaryk University, Brno, Czech Republic
2 Central European Institute of Technology, Masaryk University, Brno, Czech Republic
3 Department of Clinical Hematology, University Hospital Brno, Czech Republic
4 Department of Laboratory Methods, Faculty of Medicine, Masaryk University, Brno
5 Outpatient Ward for Hematology and Internal Medicine, Zlín, Czech Republic

**Table S1.** Blood count parameters and available coagulation parameters of family members with and without thrombocytopenia. Parameters taken at the time of molecular analysis. * - family members with *GP1BA* gene mutation.

ADP – adenosine diphosphate; Ery – erytrhrocytes; F – factor; HCT – hematocrit; HGB – hemoglobin; ISTH BAT - ISTH bleeding assessment tool; Leu – leukocytes; MCH – mean cell hemoglobin; MCHC – mean cell hemoglobin concentration; MCV – mean cell volume; MPV – mean platelet volume; PFA – platelet function assay; PLT – platelets; RDW – red blood cell distribution width; vWf - von Willebrand factor.

| **Parameter (unit)** | **Family members** | | | | | | |
| --- | --- | --- | --- | --- | --- | --- | --- |
| **II-1** | **II-2*** | **II-3** | **III-1*** | **III-2*** | **IV-1*** | **IV-2*** |
| **Leu (10˄9/L)** | 4.20 | 7.23 | 8.59 | 8.47 | 10.50 | 9.5 | 10.60 |
| **Ery (10˄12/L)** | 4.99 | 5.22 | 4.76 | 5.32 | 5.52 | 4.70 | 5.10 |
| **HGB (g/L)** | 155 | 144 | 142 | 158 | 163 | 120 | 133 |
| **HCT (L/L)** | 0.42 | 0.42 | 0.41 | 0.43 | 0.49 | 0.34 | 0.39 |
| **MCV (fL)** | - | 80.11 | 85.90 | 81.60 | 88.70 | 73.20 | 76.80 |
| **PLT (10˄9/L)** | 159.0 | 98.0 | 221.0 | 64.0 | 62.2 | 67.0 | 126.0 |
| **MCH (pg)** | - | 27.6 | 29.8 | 29.7 | 29.5 | 25.5 | 26.1 |
| **MCHC (g/L)** | - | 344 | 347 | 364 | 333 | 349 | 339 |
| **RDW (%)** | - | 14.4 | 13.0 | 12.6 | 11.8 | - | - |
| **MPV (fL)** | - | macro- thrombocytes | 10.4 | macro- thrombocytes | 13.4 | - | - |
| **PFA Collagen /Epinefrin (s)** | - | 253 | - | - | >300 | - | - |
| **PFA Collagen/ADP (s)** | - | 147 | - | - | 138 | - | - |
| **F VIII (%)** | - | 229 | - | - | 146 | - | - |
| **VWF:Ag (%)** | - | 159 | - | - | 114 | - | - |
| **VWF:Ac (%)** | - | >150 | - | - | 142 | - | - |
| **VWF:CB (%)** | - | >104 | - | - | >104 | - | - |
| **Aggregation Collagen 2 (%)** | - | 79.3 | - | - | 73.4 | - | - |
| **Aggregation Collagen 5 (%)** | - | - | - | - | 75.5 | - | - |
| **Aggregation ADP 5 (%)** | - | 70.7 | - | - | 42.1 | - | - |
| **Aggregation ADP 10 (%)** | - | - | - | - | 54.6 | - | - |
| **Aggregation Epinefrin (%)** | - | 74.1 | - | - | 15.2 | - | - |
| **Aggregation Ristocetin (%)** | - | - | - | - | 0.9 | - | - |
| **Aggregation Ristocetin, low (%)** | - | - | - | - | 68.3 | - | - |
| **Aggregation Arachid acid (%)** | - | - | - | - | - | - | - |
| **ISTH BAT** | 0 | 6 | 0 | 3 | 4 | 0 | 0 |
